# Supplementary material for: Citrate-functionalized hydroxyapatite nanoparticles for pH-responsive drug delivery
Source: Royal Society of Chemistry journal article supplement (doi:10.1039/c6ra10659e), 2016-01-01
Supplement: c6ra10659e1.pdf [file c6ra10659e1.pdf]

## Electronic Supplementary Information (ESI)

### Citrate-functionalized Hydroxyapatite Nanoparticles for pH-responsive Drug Delivery

Gunjan Verma<sup>\*a</sup>, K. C. Barick<sup>a</sup>, Neena G. Shetake<sup>b</sup>, B. N. Pandey<sup>b</sup>, P. A. Hassan<sup>a</sup>

<sup>a</sup>Chemistry Division, <sup>b</sup>Radiation Biology and Health Sciences Division,  
Bhabha Atomic Research Centre, Mumbai-400085, India

\*Corresponding author: Email: [gunjanv@barc.gov.in](mailto:gunjanv@barc.gov.in) (Gunjan Verma)

Tel: + 91- 22-25590288, Fax: + 91- 22-25505151

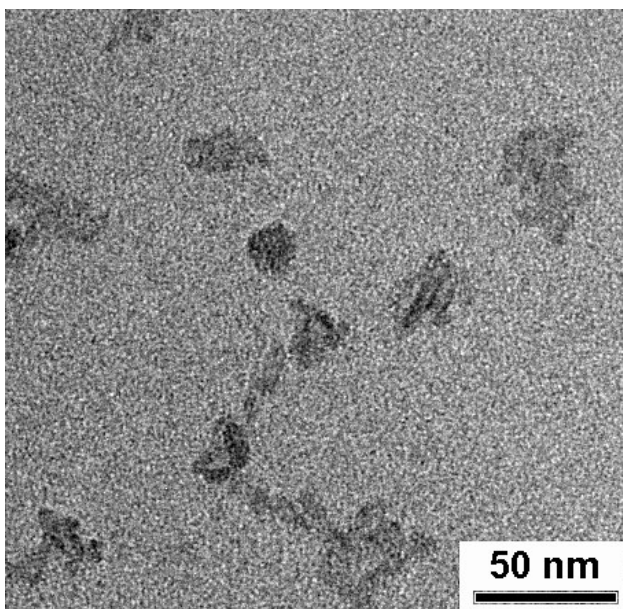

Fig. S1. TEM micrograph of Cit-HANPs.

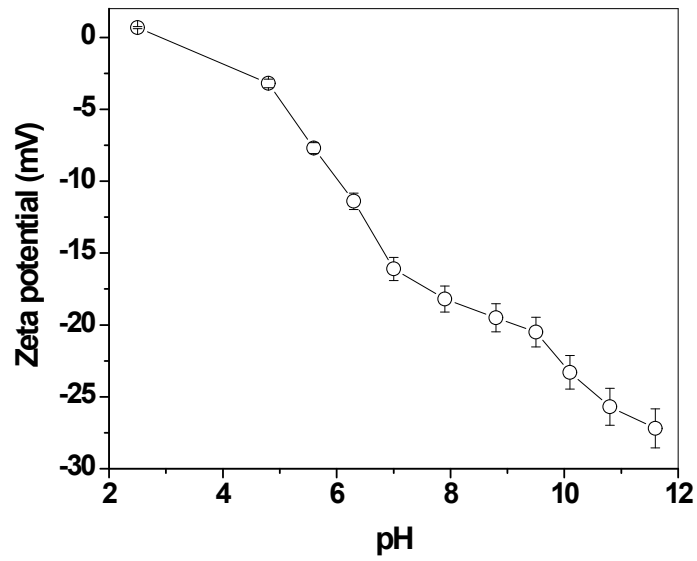

Fig. S2. Zeta potential of Cit-HANPs as a function of pH.

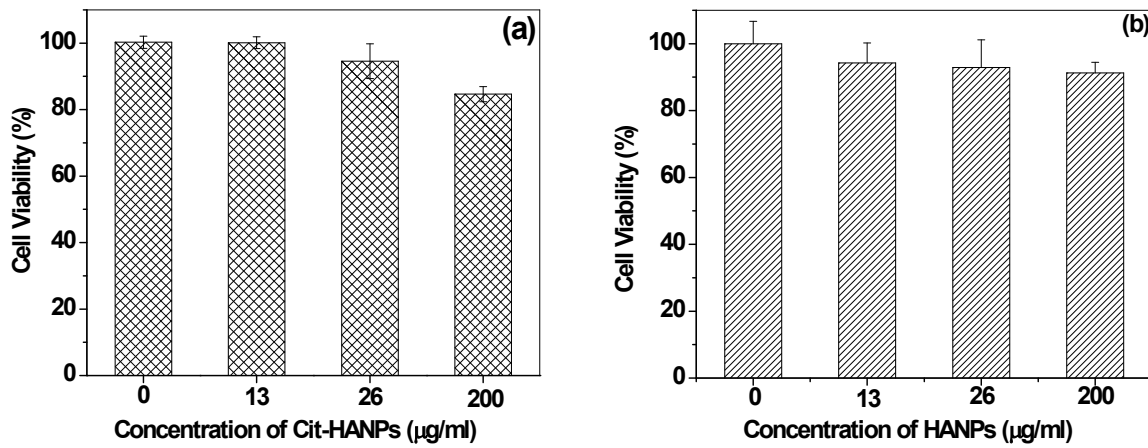

Fig. S3. Viability studies of WEHI-164 cells incubated with medium containing (a) Cit-HANPs (b) HANPs for 48 h.

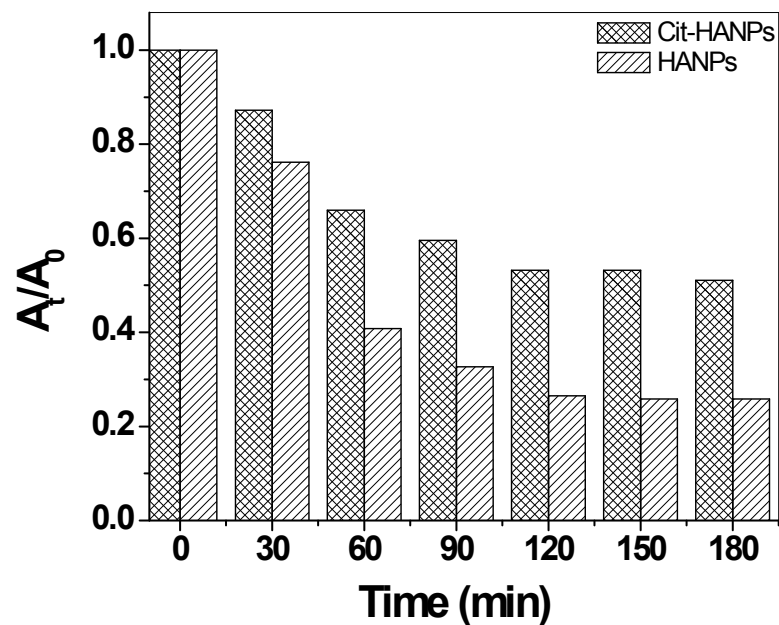

Fig. S4. Normalized UV absorbance ( $A_t/A_0$ , where  $A_t$  = absorbance at time 't' and  $A_0$  = Absorbance at  $t = 0$ ) of Cit-HANPs and HANPs in PBS buffer saline) with respect to time.
